# Supplementary material
Source: Research Square preprint supplement (doi:10.21203/rs.3.rs-8412981/v1)
Supplement: Supplementary file 1 [file 7c5bd67e9c6d4f2297b02e5f.xlsx]

## Sheet: Sheet1
province	name	taobao	brand	product	p_level	logistics	l_level	service	s_level	BA	category	year	n_product	price	total	ncomment	nword	brand heritage
北京	吴裕泰	40		9.65	2	9.5	3	8.94	2	9.36333	1	1887	120	251.57	572	4500	3761	757.071
北京	稻香村	46.5		9.88	3	10	3	8.85	2	9.57667	3	1773	20	56.72	209	1662	2230	263.389
北京	同升和		4.9	10	3	9.35	3	9.69	3	9.68	5	1902	219	428.85	8	138	249	11.032
北京	中茶	41.1		9.81	3	9.5	3	8.84	1	9.38333	1	1949	240	853.51	133	1029	2081	176.512
北京	六必居	37.3	4.5	9.85	3	9.22	2	9.19	3	9.42	3	1530	85	45.75	346	1583	2503	470.239
北京	天福号			10	3	9.94	3	9.38	3	9.77333	3	1738	67	97.84	333	1249	1745	450.933
北京	白塔寺		4	10	3	9.87	3	8.71	1	9.52667	4	1872	842	46.19	0	112	156	0
北京	桂香村		3.5	9.68	2	9.58	3	9	2	9.42	3	1916	20	38.52	16	110	330	8.274
北京	月盛斋		4.5	9.69	2	9.26	3	9.24	3	9.39667	3	1775	39	147.17	425	1855	2717	579.18
北京	王致和		4	9.91	3	9.17	2	8.84	1	9.30667	3	1669	32	25.29	238	2070	1602	322.686
北京	内联升			9.71	2	9.65	3	9.28	3	9.54667	5	1853	428	466.49	100	629	1299	131.005
北京	一得阁	45.9	4.5	9.85	3	8.59	1	9.06	2	9.16667	6	1865	114	72.75	111	932	1650	147.553
北京	全聚德	36.4	4	9.33	1	9.37	3	8.55	1	9.08333	3	1864	33	142.55	165	1540	2243	213.745
北京	荣宝斋			9.85	3	10	3	9.19	3	9.68	6	1672	693	872.38	42	519	1127	52.402
北京	张一元	43.1	4	9.5	2	9.4	3	8.46	1	9.12	1	1900	93	311.65	264	1888	2447	347.508
北京	义利		3.5	9.42	2	8.13	1	8.9	2	8.81667	3	1906	37	21.08	480	1489	2109	650.888
北京	牛栏山	40.1		9.81	3	10	3	8.61	1	9.47333	2	1952	67	792.62	213	1952	2384	267.526
北京	百花	45.5	4.5	9.49	2	9.62	3	9.14	3	9.41667	3	1833	69	328.08	375	1811	2604	455.07
北京	红星	37.3		9.92	3	10	3	9.04	3	9.65333	2	1949	61	312.28	301	1930	2396	377.846
北京	东来顺	37.6		9.91	3	9.62	3	8.84	1	9.45667	3	1903	35	317.56	205	1758	2813	279.937
北京	馥郁		3	9.55	2	9.51	3	8.79	1	9.28333	1	1935	34	105.73	9	140	209	12.411
北京	京华		4	9.63	2	8.96	2	8.32	1	8.97	1	1950	24	87.67	403	1310	2288	541.947
北京	红螺		3	10	3	8.26	1	9.25	3	9.17	3	1909	53	33.46	222	1760	2107	296.485
北京	永丰	37.8		9.84	3	10	3	8.98	2	9.60667	2	1949	11	397.34	115	1524	1922	133.763
天津	狗不理		3	9.73	2	8.53	1	8.54	1	8.93333	3	1858	15	119	169	1267	2233	226.156
天津	桂发祥		4.9	10	3	9.63	3	9.48	3	9.70333	3	1927	20	80.05	128	776	1422	169.617
天津	飞鸽		4	8.55	1	8.31	1	9.07	2	8.64333	6	1950	8	481.63	29	426	857	19.306
天津	金星牌			9.93	3	9.37	3	9.06	3	9.45333	2	1322	74	691.31	58	270	889	73.087
天津	海鸥	37.8	4.5	8.84	1	9.34	3	9.08	2	9.08667	6	1955	138	2352.64	87	842	2340	53.781
天津	鹦鹉	41	4.5	9.84	2	9.15	2	8.38	1	9.12333	6	1950	38	3704.74	11	113	267	15.169
天津	津酒		4.9	10	3	9.43	3	9	3	9.47667	2	1951	58	434.4	50	895	1498	56.539
天津	桂顺斋			9.93	3	9.62	3	8.81	1	9.45333	3	1924	18	27.8	580	2000	2535	781.893
天津	义聚永记		4.9	10	3	9.64	3	9.2	3	9.61333	2	1880	74	691.31	58	270	888	73.087
天津	老美华			9.94	3	9.71	3	9.61	3	9.75333	5	1911	71	175.12	10	120	310	13.79
河北	金凤		4.9	10	3	9.55	3	9.28	3	9.61	3	1984	30	51.6	113	817	1375	151.69
河北	槐茂		4	9.94	3	9.45	3	8.67	1	9.35333	3	1671	41	25.8	79	330	742	103.425
河北	刘伶		4.5	9.99	3	9.21	2	9.29	3	9.49667	2	1126	8	692.62	5	110	319	6.895
河北	衡水老白干			9.9	3	10	3	8.88	1	9.59333	2	1946	41	977.55	144	1305	2208	155.827
河北	十里香			9.48	2	9.87	3	8.86	1	9.40333	2	1946	12	588.44	72	702	1326	66.192
河北	板城烧锅		4.5	10	3	9.33	3	9.24	3	9.52333	2	1956	35	487.55	16	242	657	16.548
山西	东湖		4	9.88	3	9.38	3	8.5	1	9.25333	3	1368	66	107.48	194	1243	2019	257.873
山西	广誉远		4.5	9.43	2	9.3	3	9.44	3	9.39	4	1541	7	689.29	54	638	1293	71.708
山西	溢源庆		4.5	9.08	1	9.35	3	9.37	3	9.26667	3	1377	64	80.91	47	287	769	53.781
山西	荣欣堂		4	9.85	3	8.89	2	8.87	2	9.20333	3	1995	46	44.12	197	1689	2446	262.01
山西	汾酒			9.87	3	10	3	8.9	2	9.59	2	1949	51	1105.44	179	1819	2800	212.366
山西	晋泉		4	9.3	1	9.09	2	8.9	2	9.09667	2	1950	61	218.14	111	1397	2251	135.142
山西	福同惠		3.5	9.79	3	9	2	9	2	9.26333	3	1795	44	47.34	19	162	228	24.822
山西	杏花村	41.2		9.87	3	10	3	8.94	2	9.60333	2	1953	41	388.49	18	272	784	19.306
内蒙古	河套	35.9	4.5	10	3	8.98	2	9.1	3	9.36	2	1952	20	670.5	44	535	1146	35.854
内蒙古	鸿茅	37	3.5	8.86	1	8.54	1	9	2	8.8	4	1739	19	1089.35	22	393	871	27.58
吉林	老龙口		4	9.9	3	10	3	8.34	1	9.41333	2	1662	34	686.88	85	820	1417	103.425
吉林	道光		3	9.1	1	8.64	1	9.07	3	8.93667	2	1801	18	1275.91	2	122	219	2.758
吉林	凤山		3.5	9.26	1	8.2	1	8.89	2	8.78333	2	1856	26	117.63	36	256	855	42.749
吉林	千山		3.5	9.9	3	8.63	1	9	3	9.17667	2	1658	16	310.67	22	142	657	26.201
吉林	榆树钱		4.5	9.22	1	9.76	3	8.56	1	9.18	2	1812	61	547.2	44	570	1101	55.16
吉林	鼎丰真		4.5	9.98	3	8.73	1	9.64	3	9.45	3	1911	50	19.16	472	1339	1500	646.751
吉林	长白山		4.5	9.53	2	9.46	3	9.34	3	9.44333	2	1936	31	334.71	48	826	1509	60.676
吉林	大泉源		4.9	10	3	9.74	3	9	3	9.58	2	1884	18	215.9	14	132	624	19.306
吉林	通化		4	9.92	3	8.74	1	8.69	1	9.11667	2	1937	10	61.4	12	243	742	13.79
吉林	洮儿河牌		4	9.95	3	9.05	2	9	3	9.33333	2	1924	25	488.17	3	158	261	4.137
黑龙江	大众肉联		4	9.69	2	8.57	1	8.82	2	9.02667	3	1913	44	166.22	312	1585	2446	412.321
黑龙江	老鼎丰		4	9.54	2	9.17	2	8.9	2	9.20333	3	1911	29	41.13	368	947	1584	506.093
黑龙江	北大仓			9.81	3	9.85	3	9	3	9.55333	2	1914	32	655.62	149	1627	2582	188.923
黑龙江	玉泉		4	10	3	8.87	2	8.67	1	9.18	2	1959	32	369.17	42	532	1245	51.023
黑龙江	二克山		4	8.97	1	8.91	2	9.11	3	8.99667	3	1915	10	41.76	127	620	1261	165.48
黑龙江	富裕老窖		3.5	10	3	8.13	1	9.41	3	9.18	2	1915	25	284.86	4	106	223	5.516
黑龙江	秋林里道斯	40.4	4	9.43	2	8.88	2	9.01	2	9.10667	3	1900	43	156.11	393	1683	2398	533.673
上海	培罗蒙	36.3	4.5	9.88	3	9.35	3	9.38	3	9.53667	5	1928	259	1196.67	2	116	195	2.758
上海	杏花楼	42.5	4.5	9.55	2	9.39	3	8.79	1	9.24333	3	1851	105	40.34	410	2000	2538	557.116
上海	功德林			9.89	3	9.75	3	8.51	1	9.38333	3	1922	25	52.56	204	1130	1928	270.284
上海	恒源祥	81.9	4.5	9.82	3	9.47	3	9.31	3	9.53333	5	1927	2040	275.22	65	1214	1875	63.434
上海	泉字牌		4.9	9.98	3	9.21	2	9	2	9.39667	6	1628	362	46.73	156	1706	2097	202.713
上海	老庙	43		9.98	3	9.69	3	9.04	2	9.57	6	1906	630	4625.8	145	1088	1573	84.119
上海	古今牌	46		9.92	3	9.84	3	9.21	2	9.65667	5	1988	618	76.55	54	794	1299	59.297
上海	立丰牌	37.9	4	9.62	2	9.62	3	8.76	1	9.33333	3	1938	40	51.39	236	1523	2446	314.412
上海	鼎丰		4.5	10	3	9.69	3	9.3	3	9.66333	3	1864	53	43.33	77	665	1345	103.425
上海	吴良材		3.5	9.88	3	9.04	2	8.64	1	9.18667	6	1719	112	69.36	64	852	1355	74.466
上海	钟牌414		4.9	9.98	3	9.11	2	9.3	3	9.46333	6	1937	20	39.29	109	263	668	148.932
上海	冠生园	44.6	4.9	9.96	3	9.58	3	9.13	3	9.55667	3	1915	86	71.51	413	1803	2431	552.979
上海	美加净	66.2		9.92	3	9.6	3	8.72	1	9.41333	6	1962	36	32.45	159	1054	1585	201.334
上海	凤凰牌	40.9	4	9.63	2	9.04	2	8.66	1	9.11	6	1897	282	682.28	170	1420	2594	168.238
上海	白猫	38.7	4	9.93	3	8.89	2	9.04	2	9.28667	6	1963	145	85.6	181	1836	2347	231.672
上海	老大房		4.5	9.9	3	9.42	3	9.72	3	9.68	3	1900	48	80.69	29	253	814	38.612
上海	采芝斋	45	4.9	9.96	3	9.69	3	9.22	3	9.62333	3	1870	77	95.79	264	1382	2012	357.161
上海	光明	54.2		9.97	3	9.87	3	9.11	3	9.65	3	1911	21	74.22	184	1671	2506	212.366
上海	金枫	38.2	4	8.53	1	9.32	3	8.5	1	8.78333	2	1950	25	202.88	10	108	384	13.79
上海	光明牌		4.5	9.88	3	9.53	3	9.09	2	9.5	3	1950	48	120.72	278	1247	2241	365.435
上海	第一食品	46	4	9.78	2	9.53	3	8.81	1	9.37333	3	1926	1159	66.26	249	1330	2312	337.855
上海	三枪	42.9		9.9	3	9.54	3	9.25	2	9.56333	5	1937	657	127.59	124	1265	1779	161.343
上海	民光		4.5	9.94	3	8.58	1	9.07	2	9.19667	5	1935	76	408.2	107	368	879	143.416
上海	新雅		4.9	10	3	9.51	3	9.39	3	9.63333	3	1926	65	97.31	9	144	198	11.032
上海	沈大成	41.8		9.91	3	9.77	3	9.37	3	9.68333	3	1875	178	95.26	177	1381	2314	226.156
上海	虎		4	9.51	2	8.72	1	9.26	3	9.16333	6	1694	249	295.74	32	439	1042	41.37
上海	西泠印社	37.2	3	9.71	2	8.01	1	9.03	2	8.91667	6	1904	253	182.14	32	487	1249	34.475
上海	雷允上	36		10	3	9.83	3	9.38	3	9.73667	4	1734	64	372.33	111	523	1282	122.731
上海	红双喜	55.3		9.71	2	9.06	2	8.88	2	9.21667	6	1959	173	1344.98	22	345	1306	13.79
上海	马利	48.2	3.5	9.72	2	9.48	3	9.51	3	9.57	6	1919	84	116.19	10	141	561	12.411
上海	敦煌	37.1	4.5	9.7	2	8.68	1	8.81	1	9.06333	6	1958	84	3200.93	27	322	1224	35.854
上海	立信		4.5	9.96	3	9.36	3	9.13	3	9.48333	6	1936	235	39.26	37	630	888	49.644
上海	熊猫		4	8.98	1	9.61	3	8.75	1	9.11333	6	1985	119	474.49	30	178	533	41.37
上海	永久	37.1	4.5	9.49	2	9.2	2	8.89	2	9.19333	6	1940	436	1121.57	227	1725	3866	245.462
上海	梅林	44.6		9.78	2	9.68	3	8.97	2	9.47667	3	1930	97	64.63	454	1858	2793	621.929
上海	回力	59.9	4.9	9.6	2	9.36	3	9.42	3	9.46	5	1927	260	97.23	117	1567	1988	81.361
上海	龙虎		4	10	3	9.53	3	9.18	3	9.57	4	1911	39	21.39	21	195	528	24.822
江苏	双沟			9.93	3	9.77	3	8.64	1	9.44667	2	1732	71	561.8	84	1176	2056	103.425
江苏	三凤桥		4	9.92	3	9.14	2	8.86	2	9.30667	3	1927	29	99.27	328	1852	2398	435.764
江苏	恒顺	39.9	4.5	9.97	3	9.27	3	8.83	1	9.35667	3	1840	133	116.29	101	880	1691	125.489
江苏	三和四美			9.96	3	10	3	9.34	3	9.76667	3	1796	89	47.27	195	1526	2308	257.873
江苏	韩复兴		4.5	9.79	3	9.36	3	9.14	3	9.43	3	1966	29	41.31	213	1461	2125	279.937
江苏	玉露春		4	9.74	2	9.48	3	9	3	9.40667	1	1899	18	516.12	19	129	370	26.201
江苏	绿杨春		4	9.18	1	9.7	3	8.88	1	9.25333	1	1908	24	69.75	47	369	1036	57.918
江苏	高沟			9.92	3	9.78	3	8.98	1	9.56	2	202	50	1419.84	48	670	1330	44.128
江苏	汤沟		4	9.27	1	9.91	3	9	3	9.39333	2	1915	10	428.88	28	170	575	37.233
江苏	津津		4	9.94	3	9.75	3	8.44	1	9.37667	3	1927	69	37.57	339	1442	1935	459.207
江苏	梅兰春		4	9.45	2	0	0	9.44	3	9.445	2	1949	34	736.26	0	127	232	0
江苏	卫岗		3	8.58	1	8.67	1	8.83	1	8.69333	3	1928	23	72.15	33	293	708	44.128
江苏	玉祁酒业		4.5	10	3	9.79	3	8.63	1	9.47333	2	1954	47	275.3	30	495	974	39.991
江苏	陆稿荐		4.5	9.65	2	9.18	2	9.19	3	9.34	3	1871	56	50.4	168	998	1692	227.535
浙江	胡庆余堂		4	9.91	3	9.45	3	8.61	1	9.32333	4	1874	109	529.93	107	840	1742	128.247
浙江	五芳斋	61.4		9.65	2	9.72	3	9.17	3	9.51333	3	1921	84	51.99	202	1819	2339	270.284
浙江	咸亨		4	9.03	1	9.81	3	8.57	1	9.13667	2	1980	13	210.47	86	1015	2111	111.699
浙江	女儿红	41.9	4	8.71	1	10	3	8.57	1	9.09333	2	1919	46	280.85	68	955	1737	89.635
浙江	王星记		4	9.88	3	9.13	2	9.06	2	9.35667	6	1875	61	204.37	5	103	281	6.895
浙江	楼外楼		4	9.95	3	9.45	3	9.03	3	9.47667	3	1848	57	76.89	166	1034	1892	223.398
浙江	知味观	44		9.96	3	10	3	9.24	3	9.73333	3	1913	244	81.54	861	1819	2728	1170.77
浙江	会稽山		4	9.79	3	10	3	8.39	1	9.39333	2	1743	33	218.07	98	1297	1904	131.005
浙江	致中和	40.2		9.91	3	9.87	3	8.63	1	9.47	2	1763	14	197	174	1143	2071	220.64
浙江	西塘		4.5	10	3	9.07	2	8.73	1	9.26667	2	1618	48	191.6	31	240	634	38.612
浙江	古越龙山	47.1		9.83	3	9.98	3	9.14	3	9.65	2	1664	47	461.95	105	1247	2137	126.868
浙江	诸老大		4.5	9.68	2	9.48	3	8.99	2	9.38333	3	1887	21	41.02	21	493	1105	28.959
浙江	老恒和	38	4.5	9.81	3	9.07	2	9.14	3	9.34	3	1875	42	71.33	123	1009	1956	159.964
安徽	口子窖			9.98	3	9.34	3	9.12	3	9.48	2	1949	54	1294.66	123	1812	2282	137.9
安徽	徽六	43.9		9.89	3	9.53	3	9.41	3	9.61	1	1905	86	224.6	150	1533	2681	175.133
安徽	猴坑		4	10	3	8.88	2	8.87	1	9.25	1	1915	37	178.03	87	778	1635	110.32
安徽	谢裕大			9.56	2	9.44	3	9.08	3	9.36	1	1875	86	82.32	141	1198	2117	183.407
安徽	迎驾贡酒			9.48	2	9.47	3	8.69	1	9.21333	2	2003	81	670.16	107	1194	1913	129.626
福建	黄则和		4	9.73	2	8.9	2	9	2	9.21	3	1945	63	40.22	162	1127	1772	217.882
福建	黄金香			9.95	3	10	3	9.13	3	9.69333	3	1954	95	85.12	162	1625	2154	213.745
福建	海堤	37.9		9.95	3	9.76	3	9.35	3	9.68667	1	1954	200	223.67	209	1808	2803	246.841
江西	梁义隆		4	9.82	3	9.14	2	9	2	9.32	3	1937	69	28.81	60	293	648	81.361
江西	章贡酒		4	9.98	3	8.93	2	9.37	3	9.42667	2	1952	32	466.84	16	151	438	22.064
江西	洞山		3	9.89	3	8.71	1	8.42	1	9.00667	2	1936	19	108.16	14	200	511	15.169
山东	福字牌	35.8	4	10	3	9.22	2	8.65	1	9.29	4	1950	43	351.06	83	719	1813	110.32
山东	宏济堂	38.7	3.5	10	3	9.19	2	8.55	1	9.24667	4	1907	38	164.63	18	254	713	24.822
山东	周村		4	9.89	3	9.57	3	8.94	2	9.46667	3	1956	14	102.15	72	808	1503	89.635
山东	张裕	43.6	4	9.96	3	8.91	2	8.51	1	9.12667	2	1892	137	674.17	148	1634	2259	176.512
山东	德州扒鸡	37.6	4.5	9.88	3	9.11	2	8.96	2	9.31667	3	1692	89	105.71	376	1957	2720	478.513
山东	崔字牌		4	10	3	9.29	3	9.4	3	9.56333	3	1984	30	45.18	281	1651	2245	380.604
山东	强恕堂		4.9	10	3	9.48	3	9.48	3	9.65333	2	1922	36	530.05	9	192	364	9.653
山东	景芝酒			8.92	1	9.07	2	9	3	8.99667	2	1948	17	819.75	147	1175	2147	173.754
山东	微山湖		2.5	8.87	1	8.38	1	8.96	1	8.73667	3	1953	17	49.47	86	680	1213	115.836
山东	即墨老酒		4.5	9.67	2	9.23	2	9.44	3	9.44667	2	1949	59	164.25	208	1696	2627	273.042
山东	青岛啤酒	50.9		9.9	3	9.75	3	9.37	3	9.67333	2	1903	86	142.9	310	2000	2432	204.092
山东	崂山	35.8	4	9.31	1	8.85	2	8.83	1	8.99667	3	1900	15	89.47	24	315	1066	24.822
山东	玉兔		4.5	9.59	2	9.44	3	9	2	9.34333	3	1984	16	71.44	25	118	493	34.475
山东	永盛斋		3.5	9.73	2	9.43	3	8.14	1	9.1	3	1945	21	44.81	12	196	363	16.548
山东	兰陵		4	9.79	3	9.35	3	8.51	1	9.21667	2	1948	34	276.07	88	844	1710	114.457
山东	古贝春			9.61	2	9.89	3	9	3	9.5	2	1952	31	831.92	28	468	971	33.096
山东	扳倒井			9.96	3	10	3	8.87	1	9.61	2	1992	44	357.03	104	1816	2388	131.005
海南	真不同		3.5	9.83	3	8.73	2	9	2	9.18667	3	1895	17	75.5	45	319	844	57.918
海南	汝阳刘		3.5	9.62	2	9.12	2	9	2	9.24667	6	2005	74	248.29	8	112	394	11.032
海南	宋河		4	9.39	2	10	3	8.63	1	9.34	2	1968	30	373.16	74	628	1271	95.151
海南	王守义		4.5	9.95	3	9.39	3	8.76	1	9.36667	3	1984	39	5	90	893	904	122.731
海南	张弓		4	9.46	2	9.25	2	8.68	1	9.13	2	1951	23	199.6	125	912	1643	159.964
湖北	枝江		4	9.37	2	9.8	3	9	3	9.39	2	1817	38	577.61	61	820	1614	73.087
湖北	黄鹤楼			9.23	1	9.64	3	9.08	3	9.31667	2	1952	5	694.32	99	800	2124	125.489
湖南	火宫殿		4	9.32	1	9.05	2	9.05	2	9.14	3	1577	44	48.55	106	986	1634	142.037
广东	陈李济	36.9	4	9.7	2	8.89	2	8.58	1	9.05667	4	1600	50	447.08	209	1266	2551	266.147
广东	敬修堂		3.5	8.73	1	8.8	2	8.48	1	8.67	4	1790	2	81.79	3	203	482	4.137
广东	致美斋		4.5	10	3	9.63	3	8.64	1	9.42333	3	1608	22	54.19	13	267	378	16.548
广东	海天	55.6	4.5	9.75	2	9.01	2	8.9	2	9.22	3	1955	126	55.15	88	1562	2107	115.836
广东	广州酒家	41.5		9.91	3	9.74	3	8.84	2	9.49667	3	1935	17	142.24	84	1113	1579	106.183
广东	东古牌			9.99	3	9.03	2	9.39	3	9.47	3	1850	58	29.35	56	542	988	74.466
广东	陶陶居		4	9.54	2	9.36	3	8.8	1	9.23333	3	1880	81	110	130	1034	1970	179.27
广东	皇上皇	40.6	4.5	9.83	3	9.33	3	9.24	3	9.46667	3	1940	84	126.08	413	1953	2504	557.116
广东	咀香园		4	9.56	2	9.72	3	8.44	1	9.24	3	1918	29	58.2	180	1037	1655	239.946
广东	趣香		4	9.27	1	9.38	3	9	2	9.21667	3	1938	25	133.56	7	150	283	9.653
广东	宝生园		4	10	3	9.44	3	8.81	1	9.41667	3	1924	34	152.48	27	101	372	37.233
广东	红荔		4	9.1	1	9.36	3	8.96	2	9.14	2	1953	39	147.54	100	1211	2133	129.626
广西	龙山		3	9.79	3	8.77	1	9	3	9.18667	2	1935	4	144.09	2	123	227	2.758
重庆	白市驿		3.5	9.76	2	9.01	2	9	2	9.25667	3	1963	26	67.22	10	184	267	13.79
四川	五粮液	53.9	4.5	9.37	2	9.03	2	8.87	1	9.09	2	1909	76	6818.94	112	828	1694	93.772
四川	泸州老窖	47.4		9.87	3	10	3	9.1	3	9.65667	2	1573	97	2610.25	158	1693	2613	194.439
四川	剑南春		4	8.78	1	9.76	3	8.55	1	9.03	2	1951	42	1313.53	181	1824	2929	234.43
四川	全兴			9.64	2	9.74	3	9.41	3	9.59667	2	1951	56	340.34	69	473	1226	85.498
四川	郎牌	37.9		9.69	3	9.86	3	9.05	3	9.53333	2	1898	91	3488.38	86	1454	2846	107.562
四川	沱牌			9.81	3	9.8	3	8.72	1	9.44333	2	1945	117	1981.74	128	1813	3019	137.9
四川	鹃城牌	37.7		9.95	3	9.75	3	9	2	9.56667	3	1955	71	41.77	330	1831	2478	428.869
四川	江口醇		3.5	9.4	2	8.89	2	9	3	9.09667	2	1879	9	85.86	19	166	596	19.306
四川	丰谷		4	9.34	1	9.6	3	8.61	1	9.18333	2	1678	40	972.71	67	1093	2044	66.192
四川	清香园	36.3	4	9.91	3	9.14	2	8.48	1	9.17667	3	1828	32	56.65	65	579	1094	88.256
贵州	茅台	82.3		9.75	2	9.94	3	8.73	1	9.47333	2	1951	24	2248.1	112	1441	2405	115.836
贵州	赖永初		4.5	9.34	2	10	3	8.48	1	9.27333	2	1992	23	1743.37	109	1263	2393	111.699
贵州	鸭溪		4	8.94	1	8.99	2	8.58	1	8.83667	2	1952	10	198.57	4	165	359	2.758
贵州	董	36.7	4	9.58	2	9.03	2	9.07	3	9.22667	2	589	61	1335.45	117	1330	2481	128.247
贵州	宣字		4	9.85	3	9.44	3	9	3	9.43	3	1727	36	143.92	37	341	988	45.507
云南	吉庆牌	38.6	4	9.71	2	8.77	2	9.23	3	9.23667	3	1907	28	43.8	181	1116	1695	239.946
云南	梅花牌		4	9.72	2	9.02	2	8.94	2	9.22667	3	1915	29	44.94	182	1581	2357	235.809
云南	腾药		3	8	1	8.64	1	8.51	1	8.38333	4	1626	35	81.08	1	156	220	1.379
云南	孔雀牌		3	9.14	1	9	2	0	0	9.07	6	1851	52	570.49	6	557	612	2.758
云南	德和			9.78	2	9.57	3	9.34	3	9.56333	3	1946	104	89.36	156	1019	2130	209.608
陕西	马明仁膏药		4	10	3	9.16	2	8.47	1	9.21	4	1860	15	142.82	8	335	872	11.032
陕西	西凤	37.8		9.78	2	9.89	3	8.95	2	9.54	2	3000	20	1602.68	161	1683	1375	199.955
陕西	白水杜康		3	8.73	1	9.05	2	8.17	1	8.65	2	1709	40	288.41	31	418	1116	34.475
陕西	贾永信		3.5	9.74	2	8.91	2	9	2	9.21667	3	1928	22	50.41	18	778	245	24.822
甘肃	佛慈	37	4	9.08	1	8.99	2	9.42	3	9.16333	4	1929	40	62.69	55	873	1380	75.845
甘肃	红川			9.89	3	9.54	3	9.09	3	9.50667	2	2008	60	289.12	64	889	1873	71.708
甘肃	金徽		4	9.52	2	9.48	3	8.69	1	9.23	2	1951	73	433.48	64	969	1852	71.708
海南	南国			9.97	3	9.11	2	9.26	3	9.44667	3	1992	125	28.28	114	1826	2505	150.311
